# Supplementary material for: Benzodiazepine Use and Misuse Among Adults in the United States
Source: Atypon-hosted journal article supplement (doi:10.1176/appi.ps.201800321), 2018-12-17
Supplement: appi.ps.201800321.ds001.pdf [file appi.ps.201800321.ds001.pdf]

## Online Supplement

NSDUH queries use and misuse of prescription medications (including pain medications, tranquilizers, sedatives, and stimulants). Benzodiazepines are specifically asked about in the following tranquilizer and sedative items (survey items in *italics*)<sup>1</sup>:

### Prescription Tranquilizers

*These next questions are about any use of prescription tranquilizers. Tranquilizers are usually prescribed to relax people, to calm people down, to relieve anxiety, or to relax muscle spasms. Some people call tranquilizers "nerve pills."*

*TR01: Please look at the names and pictures of the tranquilizers shown below. Please note that some forms of these tranquilizers may look different from the pictures, but you should include any form that you have used.*

- choices provided are: "Xanax," "Xanax XR," "Alprazolam (generic)," and "Extended-release alprazolam (generic)" with images of pills for each medication option

*In the past 12 months, which, if any, of these tranquilizers have you used?*

*TR02: Please look at the names and pictures of the tranquilizers shown below.*

- choices provided are: "Ativan," "Klonopin," "Lorazepam (generic)," and "Clonazepam (generic)" with images of pills for each medication option

*In the past 12 months, which, if any, of these tranquilizers have you used?*

*TR03: Please look at the names and pictures of the tranquilizers shown below.*

- choices provided are: "Valium" and "Diazepam (generic)" with images of pills for each medication option

*In the past 12 months, which, if any, of these tranquilizers have you used?*

The tranquilizer section continues with questions to identify Cyclobenzaprine, Soma, Buspirone, Hydroxyzine, Meprobamate, or another tranquilizer (as provided by respondent).

### Prescription Sedatives

*These next questions ask about any use of prescription sedatives or barbiturates. These drugs are also called "downers" or "sleeping pills." People take these drugs to help them relax or help them sleep. Please do not include "over-the-counter" sedatives such as Sominex, Unisom, Nytol, or Benadryl.*

*SV03: Please look at the names and pictures of the tranquilizers shown below.*

- choices provided are: "Halcion," "Restoril," "Flurazepam (generic)," "Temazepam (generic)," and "Triazolam (generic)"

The sedative section included additional questions that identified Ambien, Ambien CR, Zolpidem, Extended-release zolpidem, Lunesta, Eszopiclone, Sonata, Zaleplon, Butisol, Seconal, Phenobarbital, or another sedative (as provided by respondent).

Based on responses to the Prescription Tranquilizer and Sedative Items above, NSDUH respondents endorsed use of the following benzodiazepines:

**alprazolam, chlordiazepoxide, clonazepam, diazepam, flurazepam, lorazepam, midazolam, oxazepam, temazepam, triazolam**

<sup>1</sup> Center for Behavioral Health Statistics and Quality. (2016). 2015 National Survey on Drug Use and Health: Prescription drug images for the 2015 questionnaire. Rockville, MD: Substance Abuse and Mental Health Services Administration. <https://www.samhsa.gov/data/sites/default/files/NSDUH-PillImages-2015.pdf>. Accessed August 15, 2018.
